# Supplementary material for: U.S. cities’ integration and evaluation of equity considerations into climate action plans
Source: Springer Nature journal article supplement (doi:10.1038/s42949-023-00129-6), 2023-09-13
Supplement: MOESM1 [file 42949_2023_129_MOESM1_ESM.pdf]

## Supplementary Information

Supplementary Table 1: Measurable Equity Indicators in Analyzed Climate Action Plans

|                                                                   | Indicator                                                                                                                      | Equity Measurement     | Metric Type                          | City             |
|-------------------------------------------------------------------|--------------------------------------------------------------------------------------------------------------------------------|------------------------|--------------------------------------|------------------|
| Transportation                                                    | Reduced biking deaths and injuries by neighborhood                                                                             | Spatial                | Health                               | New York, NY     |
|                                                                   | Expand electric car sharing options, including BlueLA, to all Los Angeles neighborhoods in the top 10% of the CalEnviroScreen  | Vulnerability, Spatial | Infrastructure                       | Los Angeles, CA  |
|                                                                   | Reduce costs and barriers for alternative transportation among vulnerable populations                                          | Vulnerability          | Financial Investment, Infrastructure | Houston, TX      |
|                                                                   | Increase bike share trips by 100 percent and those taken by minority or low-income populations by 120 percent.                 | Income, Race/eth       | Behavior                             | Philadelphia, PA |
|                                                                   | Equitable installation of EV charging stations, including near affordable housing                                              | Income                 | Infrastructure                       | Columbus, OH     |
|                                                                   | Income-based EV subsidies                                                                                                      | Income                 | Financial Investment                 | Washington D.C.  |
|                                                                   | % Households 1/4 mile from bike route in East Portland compared to city                                                        | Spatial                | Infrastructure                       | Portland, OR     |
|                                                                   | % Streets with at least one sidewalk fully paved in East Portland compared to city                                             | Spatial                | Infrastructure                       | Portland, OR     |
|                                                                   | % Households within 1/4 mile of frequent transit service in East Portland compared to city                                     | Spatial                | Infrastructure                       | Portland, OR     |
|                                                                   | ZEV (zero-emissions vehicle) adoption in frontline communities                                                                 | Vulnerability          | Behavior change                      | Oakland, CA      |
| Total mobility infrastructure investment in frontline communities | Vulnerability                                                                                                                  | Financial Investment   | Oakland, CA                          |                  |
| Housing                                                           | Create or preserve 50,000 income-restricted affordable housing units by 2035 and increase stability for renters                | Income                 | Infrastructure                       | Los Angeles, CA  |
|                                                                   | # Retrofitted housing units in underserved communities                                                                         | Vulnerability          | Infrastructure                       | Chicago, IL      |
|                                                                   | Number of affordable housing units that meet energy standards                                                                  | Income                 | Infrastructure                       | Phoenix, AZ      |
|                                                                   | Number of affordable housing units in TOD areas                                                                                | Income                 | Infrastructure                       | Phoenix, AZ      |
|                                                                   | Provide critical long-term home repair in 25,000 low and moderate income single and multi-family homes by 2026                 | Income                 | Infrastructure                       | Philadelphia, PA |
|                                                                   | # Of affordable housing units with 75% of new housing located within 1/2 mile of Imagine Austin activity centers and corridors | Income                 | Infrastructure                       | Austin, TX       |
|                                                                   | Incentive packages for developers of green social housing projects in LMI communities                                          | Income                 | Financial Investment                 | Washington D.C   |

|                                     | <b>Indicator</b>                                                                                                                                                                                  | <b>Equity Measurement</b>                                  | <b>Metric Type</b>   | <b>City</b>     |
|-------------------------------------|---------------------------------------------------------------------------------------------------------------------------------------------------------------------------------------------------|------------------------------------------------------------|----------------------|-----------------|
| <b>Air Quality</b>                  | % Of new publicly funded affordable housing that follows zero net carbon construction guidelines                                                                                                  | Income                                                     | Infrastructure       | Boston, MA      |
|                                     | # Of affordable housing units built near transit                                                                                                                                                  | Income                                                     | Infrastructure       | Oakland, CA     |
|                                     | # And type of building retrofits in frontline communities                                                                                                                                         | Vulnerability                                              | Infrastructure       | Oakland, CA     |
|                                     | Decrease in PM2.5 emissions by neighborhood                                                                                                                                                       | Spatial                                                    | Environment          | New York, NY    |
|                                     | Reduced truck traffic by neighborhood based on collection bins                                                                                                                                    | Spatial                                                    | Infrastructure       | New York, NY    |
|                                     | Reduce the number of annual childhood asthma-related emergency room visits in L.A.'s most contaminated neighborhoods to less than 14 per 1,000 children by 2025; and 8 per 1,000 children by 2035 | Spatial                                                    | Health               | Los Angeles, CA |
|                                     | % asthma rates in minority communities                                                                                                                                                            | Race/eth                                                   | Health               | San Antonio, TX |
|                                     | Pollution levels and localized health impacts among vulnerable residents                                                                                                                          | Vulnerability                                              | Ecological, Health   | Oakland, CA     |
|                                     | 50% decrease in childhood asthma-related hospital admissions in target neighborhoods, reduce disparities between neighborhoods                                                                    | Vulnerability, Spatial                                     | Health               | Oakland, CA     |
|                                     | <b>Disaster Risk</b>                                                                                                                                                                              | Number of Cool Roofs buildings by heat vulnerability index | Vulnerability        | Infrastructure  |
| Heat vulnerability index            |                                                                                                                                                                                                   | Vulnerability                                              | Index Score          | Chicago, IL     |
| Average temperatures by income/race |                                                                                                                                                                                                   | Income, race/eth                                           | Ecological           | Dallas, TX      |
| Flood exposure by income/race       |                                                                                                                                                                                                   | Income, race/eth                                           | Ecological           | Dallas, TX      |
| <b>Food &amp; Water</b>             | Ensure all low-income Angelenos live within 1/2 mile of fresh food by 2035                                                                                                                        | Income                                                     | Infrastructure       | Los Angeles, CA |
|                                     | Achieve 100% enrollment of eligible households in CalFresh/SNAP                                                                                                                                   | Income                                                     | Behavior             | Los Angeles, CA |
|                                     | Provide drinking water access at 5 sites of highest need and install or retrofit hydration stations at municipal buildings                                                                        | Vulnerability                                              | Infrastructure       | Los Angeles, CA |
|                                     | Funds for local food systems that feed food insecure                                                                                                                                              | Vulnerability                                              | Financial Investment | Phoenix, AZ     |
|                                     | tons of edible food recovered and redistributed in frontline communities                                                                                                                          | Vulnerability                                              | Behavior             | Oakland, CA     |
|                                     | Increased # of grocery stores in food deserts                                                                                                                                                     | Vulnerability                                              | Infrastructure       | Tulsa, OK       |
|                                     | Increase in use of the WIC program                                                                                                                                                                | Income                                                     | Behavior             | Tulsa, OK       |
|                                     | Increased low-income access to healthy food at businesses and farmer's markets - number of markets accepting assistance, including SNAP and WIC                                                   | Income                                                     | Behavior             | Cincinnati, OH  |
|                                     | % Of residents with convenient access to healthy, affordable food - measured by # food insecure households                                                                                        | Vulnerability                                              | Health               | Cincinnati, OH  |

|                                                                                                                                                           | Indicator                                                                                                                                                                               | Equity Measurement              | Metric Type                          | City              |
|-----------------------------------------------------------------------------------------------------------------------------------------------------------|-----------------------------------------------------------------------------------------------------------------------------------------------------------------------------------------|---------------------------------|--------------------------------------|-------------------|
| Energy                                                                                                                                                    | Invest \$100 million in energy efficiency programs to renters and affordable housing customers                                                                                          | Income                          | Financial investment                 | Los Angeles, CA   |
|                                                                                                                                                           | % Community renewables subscriptions in LMI residents                                                                                                                                   | Income                          | Behavior                             | Chicago, IL       |
|                                                                                                                                                           | % Eligible SFPUC customers on low-income rates                                                                                                                                          | Income                          | Behavior                             | San Francisco, CA |
|                                                                                                                                                           | # Low-income customers enrolled in SFPUC customer programs                                                                                                                              | Income                          | Behavior                             | San Francisco, CA |
|                                                                                                                                                           | Number of low- and fixed-income residents whose energy bill becomes more predictable and affordable as a result of their participation in a Community Choice Energy program             | Income                          | Behavior                             | Boston, MA        |
|                                                                                                                                                           | Decrease household energy burden by 10%, focused on: all households, low-income households, multi-family low-income households, African American households, Latino households, renters | Income, race/eth                | Financial investment, Infrastructure | Cincinnati, OH    |
| Green Space                                                                                                                                               | Establish 25 joint-use parks in underserved communities                                                                                                                                 | Vulnerability                   | Infrastructure                       | Los Angeles, CA   |
|                                                                                                                                                           | % Tree canopy coverage by neighborhood                                                                                                                                                  | Spatial                         | Infrastructure                       | Chicago, IL       |
|                                                                                                                                                           | Tree equity standard                                                                                                                                                                    | Vulnerability                   | Infrastructure                       | Phoenix, AZ       |
|                                                                                                                                                           | Distribution of green space by race                                                                                                                                                     | Race/eth                        | Infrastructure                       | Austin, TX        |
|                                                                                                                                                           | Increase equitable tree canopy across neighborhoods based on SVI                                                                                                                        | Vulnerability                   | Infrastructure                       | Columbus, OH      |
|                                                                                                                                                           | % Households ½ mile from a neighborhood park and three miles from a community center in East Portland compared to city                                                                  | Spatial                         | Infrastructure                       | Portland, OR      |
|                                                                                                                                                           | Tree canopy coverage in frontline communities per CalEnviroScreen 3.0                                                                                                                   | Vulnerability                   | Infrastructure                       | Oakland, CA       |
| Targeted tree planting in areas with the lowest tree canopies which tend to be the most disadvantaged areas - measured in # trees planted throughout city | Vulnerability                                                                                                                                                                           | Infrastructure                  | Cincinnati, OH                       |                   |
| Green Jobs                                                                                                                                                | Offer Green Jobs courses at L.A. Trade Technical College for 250 students and place them in internships                                                                                 | Income                          | Behavior                             | Los Angeles, CA   |
|                                                                                                                                                           | % Of CleanPowerSF products and services procured from women, minority, disabled veteran, or LGBT-owned businesses                                                                       | Gender, race/eth, vulnerability | Behavior                             | San Francisco, CA |
|                                                                                                                                                           | Number of construction work hours on public and large private projects performed by Boston residents, women, POC                                                                        | Gender, race/eth, income        | Behavior                             | Boston, MA        |
| Public Participation                                                                                                                                      | Number of minority group participants in Street Team projects                                                                                                                           | Race/eth                        | Behavior                             | Boston, MA        |
|                                                                                                                                                           | Number of minority/women-owned small businesses interviewed for climate action plan                                                                                                     | Race/eth, gender                | Behavior                             | Boston, MA        |
|                                                                                                                                                           | # Oaklanders, and frontline communities specifically, directly engaged in ECAP implementation activities                                                                                | Vulnerability                   | Behavior                             | Oakland, CA       |

|                                             | Indicator                                                                                                                                               | Equity Measurement     | Metric Type          | City              |
|---------------------------------------------|---------------------------------------------------------------------------------------------------------------------------------------------------------|------------------------|----------------------|-------------------|
| General Planning & Vulnerability Assessment | "Healthy places" place-based initiative: # participants in neighborhood associations in high-needs neighborhoods                                        | Vulnerability, Spatial | Behavior             | Tulsa, OK         |
|                                             | Improve the raw scores of CalEnviroScreen indicators of L.A. communities in the top 10% by an average of 25% by 2025; and 50% by 2035                   | Vulnerability          | Index score          | Los Angeles, CA   |
|                                             | Capital improvement and grant funding in underserved communities                                                                                        | Vulnerability          | Financial investment | San Diego, CA     |
|                                             | Social vulnerability index                                                                                                                              | Vulnerability          | Index score          | Columbus, OH      |
|                                             | Social vulnerability index                                                                                                                              | Vulnerability          | Index score          | Indianapolis, IN  |
|                                             | % Community-endorsed plans in neighborhoods and business districts in communities with environmental justice burden as identified in EJ Communities Map | Vulnerability, spatial | Behavior change      | San Francisco, CA |
|                                             | Social vulnerability index                                                                                                                              | Vulnerability          | Index score          | Boston, MA        |
|                                             | # And % of community repair, resale, and sharing facilities in frontline communities                                                                    | Vulnerability          | Infrastructure       | Oakland, CA       |
|                                             | "Healthy places" place-based initiative: Decrease # of vacant lots in high-needs neighborhood                                                           | Vulnerability, Spatial | Infrastructure       | Tulsa, OK         |
|                                             | Increase # planning efforts that utilize a racial equity lens                                                                                           | Race/eth               | Behavior             | Tulsa, OK         |

**Supplementary Table 2: List of Analyzed Cities**

| <b>City</b>       | <b>Population</b> | <b>Climate Action Plan</b> | <b>Climate Action Plan Year</b> |
|-------------------|-------------------|----------------------------|---------------------------------|
| New York City, NY | 8,467,513         | Yes                        | 2017                            |
| Los Angeles, CA   | 3,849,297         | Yes                        | 2019                            |
| Chicago, IL       | 2,696,555         | Yes                        | 2022                            |
| Houston, TX       | 2,288,250         | Yes                        | 2020                            |
| Phoenix, AZ       | 1,624,569         | Yes                        | 2021                            |
| Philadelphia, PA  | 1,576,251         | Yes                        | 2021                            |
| San Antonio, TX   | 1,451,853         | Yes                        | 2019                            |
| San Diego, CA     | 1,381,611         | Yes                        | 2022                            |
| Dallas, TX        | 1,288,457         | Yes                        | 2020                            |
| San Jose, CA      | 983,489           | Yes                        | 2018                            |
| Austin, TX        | 964,177           | Yes                        | 2020                            |
| Jacksonville, FL  | 954,614           | No                         | -                               |
| Fort Worth, TX    | 935,508           | No                         | 2019                            |
| Columbus, OH      | 906,528           | Yes                        | 2021                            |
| Indianapolis, IN  | 882,039           | Yes                        | 2019                            |
| Charlotte, IN     | 879,709           | No                         | -                               |
| San Francisco, CA | 815,201           | Yes                        | 2021                            |
| Seattle, WA       | 733,919           | Yes                        | 2013                            |
| Denver, CO        | 711,463           | Yes                        | 2018                            |
| Oklahoma City, OK | 687,725           | Yes                        | 2020                            |
| Nashville, TN     | 678,851           | No                         | -                               |
| El Paso, TX       | 678,415           | No                         | -                               |
| Washington, D.C.  | 670,050           | Yes                        | 2018                            |
| Boston, MA        | 654,776           | Yes                        | 2019                            |
| Las Vegas, NV     | 646,790           | No                         | -                               |
| Portland, OR      | 641,162           | Yes                        | 2015                            |
| Detroit, MI       | 632,464           | Yes                        | 2017                            |
| Louisville, KY    | 628,594           | Yes                        | 2020                            |
| Memphis, TN       | 628,127           | Yes                        | 2019                            |
| Baltimore, MD     | 576,498           | Yes                        | 2012                            |
| Milwaukee, WI     | 569,330           | Yes                        | 2019                            |
| Albuquerque, NM   | 562,599           | Yes                        | 2021                            |
| Fresno, CA        | 544,510           | Yes                        | 2020                            |
| Tucson, AZ        | 543,242           | Yes (draft)                | 2023                            |
| Sacramento, CA    | 525,041           | Yes (draft)                | 2022                            |

| <b>City</b>          | <b>Population</b> | <b>Climate Action Plan</b> | <b>Climate Action Plan Year</b> |
|----------------------|-------------------|----------------------------|---------------------------------|
| Mesa, AZ             | 509,475           | Yes                        | 2022                            |
| Kansas City, MO      | 508,394           | Yes                        | 2021                            |
| Atlanta, GA          | 496,461           | Yes                        | 2015                            |
| Omaha, NE            | 487,300           | No                         | -                               |
| Colorado Springs, CO | 483,956           | No                         | -                               |
| Raleigh, NC          | 469,124           | Yes                        | 2021                            |
| Virginia Beach, VA   | 457,672           | Yes                        | 2020                            |
| Long Beach, CA       | 456,062           | Yes                        | 2022                            |
| Miami, FL            | 439,890           | Yes                        | 2020                            |
| Oakland, CA          | 433,823           | Yes                        | 2020                            |
| Minneapolis, MN      | 425,336           | Yes                        | 2013                            |
| Tulsa, OK            | 411,401           | Yes                        | 2018                            |
| Bakersfield, CA      | 407,615           | No                         | -                               |
| Wichita, KS          | 395,699           | No                         | -                               |
| Arlington, TX        | 392,786           | Yes                        | 2021                            |
| Aurora, CO           | 389,347           | Yes                        | 2009                            |
| Tampa, FL            | 387,050           | Yes                        | 2020                            |
| New Orleans, LA      | 376,971           | Yes                        | 2022                            |
| Cleveland, OH        | 367,991           | Yes                        | 2018                            |
| Anaheim, CA          | 345,940           | Yes                        | 2020                            |
| Honolulu, HI         | 345,510           | Yes                        | 2020                            |
| Henderson, NV        | 322,178           | Yes                        | 2009                            |
| Stockton, CA         | 322,120           | Yes                        | 2019                            |
| Lexington, KY        | 321,793           | No                         | -                               |
| Corpus Christi, TX   | 317,773           | No                         | -                               |
| Riverside, CA        | 317,261           | Yes                        | 2016                            |
| Santa Ana, CA        | 309,441           | Yes                        | 2015                            |
| Orlando, FL          | 309,154           | Yes                        | 2018                            |
| Irvine, CA           | 309,031           | No                         | -                               |
| Cincinnati, OH       | 308,935           | Yes                        | 2018                            |
| Newark, NJ           | 307,220           | Yes                        | 2013                            |
| Saint Paul, MN       | 307,193           | Yes                        | 2019                            |
| Pittsburgh, PA       | 300,431           | Yes                        | 2018                            |

**Supplementary Table 3: Coding Reliability and Agreement Percentage**

| <b>Variable</b>                                                                                                                                                                                            | <b>Number of Plans</b> | <b>Number of Independent Coders</b> | <b>Krippendorff's Alpha</b> | <b>Agreement Percentage</b> |
|------------------------------------------------------------------------------------------------------------------------------------------------------------------------------------------------------------|------------------------|-------------------------------------|-----------------------------|-----------------------------|
| Does the plan address mitigation?                                                                                                                                                                          | 55                     | 2                                   | 0.38                        | 94.55%                      |
| Does the plan address adaptation?                                                                                                                                                                          | 55                     | 2                                   | 0.81                        | 92.73%                      |
| Does the plan address equity?                                                                                                                                                                              | 55                     | 2                                   | 0.78                        | 90.91%                      |
| Does this plan address social equity, economic equity, or both?                                                                                                                                            | 55                     | 2                                   | 0.88                        | 92.73%                      |
| APA 1: Does the plan partner with communities to exchange information about community risks?                                                                                                               | 55                     | 2                                   | 0.70                        | 85.45%                      |
| APA 2: Does the plan aim to empower communities through community-based participatory planning?                                                                                                            | 55                     | 2                                   | 0.74                        | 94.55%                      |
| APA 3: Does the plan propose funding for projects identified by communities (local knowledge)?                                                                                                             | 55                     | 2                                   | 0.93                        | 96.36%                      |
| APA 4: Does the plan specify prioritization of equitable procurement of planning services (disadvantaged, minority-owned, and women-owned firms and planners of all protected classes) in future projects? | 55                     | 2                                   | 0.77                        | 94.55%                      |
| APA 5: Does the plan consider social equity in all adaptation and mitigation decisions?                                                                                                                    | 55                     | 2                                   | 0.96                        | 98.18%                      |
| APA 6: Does the plan include equity in cost-benefit analyses?                                                                                                                                              | 55                     | 2                                   | 0.89                        | 94.55%                      |
| Do equity considerations address adaptation, mitigation, or both?                                                                                                                                          | 55                     | 2                                   | 0.97                        | 98.18%                      |
| Does the plan contain indicators to show equity goals have been met?                                                                                                                                       | 55                     | 2                                   | 0.92                        | 96.36%                      |
| Are these indicators measurable?                                                                                                                                                                           | 55                     | 2                                   | 0.65                        | 85.45%                      |
